# Supplementary material
Source: PubMed Central journal article supplement (PMC5123836)
Supplement: NIHMS820522-supplement.pdf [file NIHMS820522-supplement.pdf]

## SUPPLEMENTAL MATERIAL

### Intact fetoplacental growth in microRNA-210 deficient mice

Kamil Krawczynski, Takuya Mishima, Xin Huang, Yoel Sadovsky

**Suppl. Table S1: Primer sequences used for genotyping (multiplex PCR) and sex determination.**

| Direction/Name | Species | Product length | Sequence             |
|----------------|---------|----------------|----------------------|
| F1             | Mouse   | 250 bp         | AGACAGGCCTGCTTGTAGGA |
| F2             | Mouse   | 500 bp         | GGTCACTGCCAGGACTACGT |
| R              | Mouse   |                | TCAGGAGGTGGGTCTGTAG  |
| SRY F          | Mouse   | 360 bp         | ATTTATGGTGTGGTCCCGTG |
| SRY R          | Mouse   |                | AAGCTTTGCTGGTTTTTGA  |

**Suppl. Table S2: Primer sequences used for qPCR of selected miR-210 target mRNAs .**

| Gene name | Species | Direction | Location                  | Sequence                  |
|-----------|---------|-----------|---------------------------|---------------------------|
| EFNA3     | Mouse   | F         | 1387-1406 of NM_010140.3  | CCGCAGTCAGCATCACAACT      |
|           |         | R         | 1438-1462 of NM_010140.3  | TTTCTGGAAGTCCGATCTTTCTTAA |
| HOXA1     | Mouse   | F         | 492-510 of NM_001311118.1 | CTTCTCCAGCGCAGACCTT       |
|           |         | R         | 606-623 of NM_001311118.1 | CTGTGAGCTGCTTGGTGGT       |
| ISCU      | Mouse   | F         | 369-388 of NM_025526.4    | CCCTGACCATCAAAAACACC      |
|           |         | R         | 504-523 of NM_025526.4    | TCACTGCTTCTCTGGCTCCT      |
| NDUFA4    | Mouse   | F         | 109-129 of NM_010886.2    | AAGAAGCATCCCAGCTTGATT     |
|           |         | R         | 203-223 of NM_010886.2    | TTCTGTCCCAGCTGACATCTG     |
| L32       | Mouse   | F         | 67-87 of NM_001101561.2   | CCTCTGGTGAAGCCCAAGATC     |
|           |         | R         | 150-168 of NM_001101561.2 | TCTGGGTTTCCGCCAGTTT       |

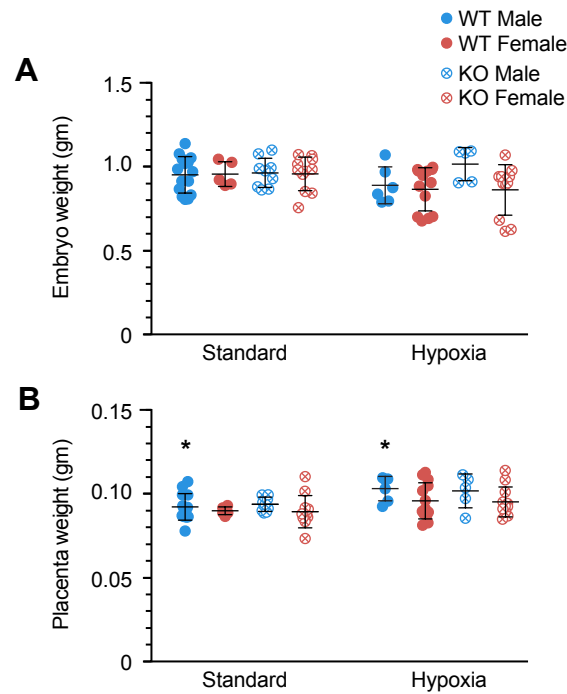

**Suppl. Fig S1: Characterization of fetoplacental weight in male and female mir-210 ko mice, exposed to standard conditions or to moderate hypoxia.** Shown are weight (grams) of wt and ko male and female embryos (A) and placentas (B). \* p<0.05.

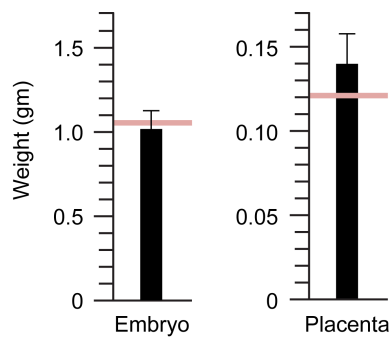

**Suppl. Fig S2: Fetoplacental weight in mice overexpressing miR-210 selectively in the placenta.** Placenta-specific overexpression of miR-210 (n=14) was performed as described by Mishima T *et al* (Scientific Reports, *in press*). The difference between control and overexpressed miR-210 was insignificant. The red line shows the mean value for controls.
